# Supplementary material
Source: PubMed Central journal article supplement (PMC6399473)
Supplement: NIHMS1519313-supplement-Major_Resource_Table.pdf [file NIHMS1519313-supplement-Major_Resource_Table.pdf]

## Major Resources Tables

### Animals (in vivo studies)

| Species                        | Vendor or Source                      | Background Strain | Sex  |
|--------------------------------|---------------------------------------|-------------------|------|
| <i>Apoa5</i> <sup>-/-</sup>    | Mutant Mice Regional Resource Centers | FVB.129X1(B6)     | Male |
| <i>Srebp-1c</i> <sup>-/-</sup> | The Jackson Laboratory                | C57BL/6J          | Male |
| <i>Ldlr</i> <sup>-/-</sup>     | The Jackson Laboratory                | C57BL/6J          | Male |
| <i>Vldlr</i> <sup>-/-</sup>    | The Jackson Laboratory                | B6;129S7          | Male |
| <i>Lrp1</i> <sup>fl/fl</sup>   | The Jackson Laboratory                | B6;129S7          | Male |

### Antibodies

| Target antigen | Vendor or Source        | Catalog # | Working concentration | Lot # (preferred but not required) |
|----------------|-------------------------|-----------|-----------------------|------------------------------------|
| apoB and apoE  | Biodesign International | #K23300R  | 1:1000                |                                    |
